# Supplementary material for: Brightly fluorescent red organic solids bearing boron-bridged π–conjugated skeletons
Source: Royal Society of Chemistry journal article supplement (doi:10.1039/c1jm12498f), 2011-01-01
Supplement: c1jm12498f.pdf [file c1jm12498f.pdf]

## Supplementary Information

### **Brightly Fluorescent Red Organic Solids Bearing Boron-Bridged $\pi$ -Conjugated Skeletons**

**Di Li,<sup>a</sup> Kai Wang,<sup>a</sup> Shuo Huang,<sup>a</sup> Songnan Qu,<sup>b</sup> Xingyuan Liu,<sup>b</sup> Qingxin Zhu,<sup>c</sup>  
Hongyu Zhang,<sup>a\*</sup> and Yue Wang,<sup>a</sup>**

<sup>a</sup> State Key Laboratory of Supramolecular Structure and Materials, College of Chemistry, Jilin University, Changchun 130012, P. R. China. E-mail: hongyuzhang@jlu.edu.cn (H. Zhang); Tel: +86-431-85168496

<sup>b</sup> Key Laboratory of Excited State Processes, Changchun Institute of Optics, Fine Mechanics and Physics, Chinese Academy of Sciences, Changchun 130033, P.R. China.

<sup>c</sup> State Key Laboratory of Inorganic Synthesis and Preparative Chemistry, College of Chemistry, Jilin University, Changchun 130012, P. R. China.

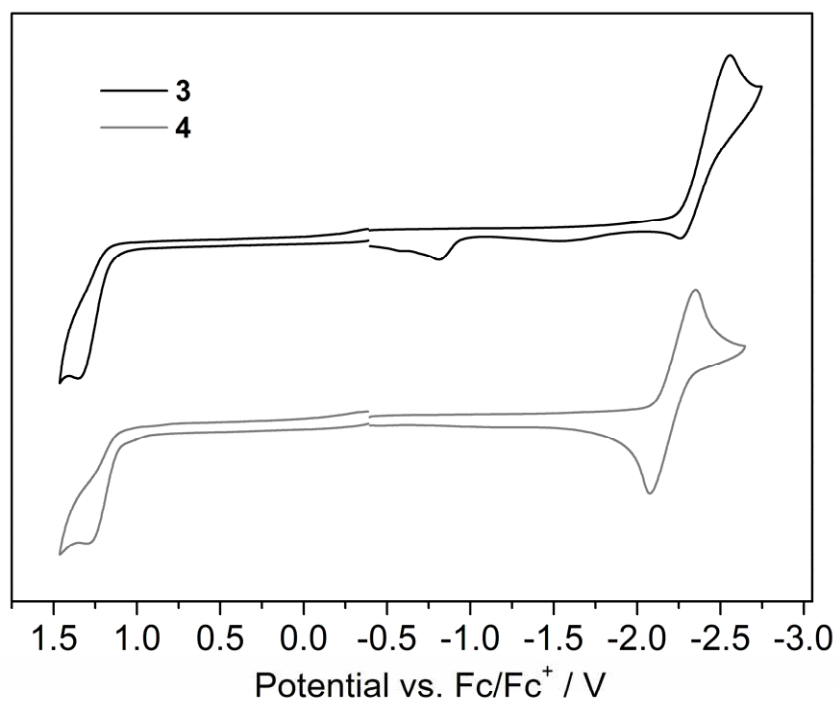

**Fig. S1** Cyclic voltammograms of **3** (black line) and **4** (gray line) in CH<sub>2</sub>Cl<sub>2</sub> (oxidation, 1 mM) and THF (reduction, 1 mM), measured with TBAP (0.1 M) as a supporting electrolyte at a scan rate of 100 mV s<sup>-1</sup>

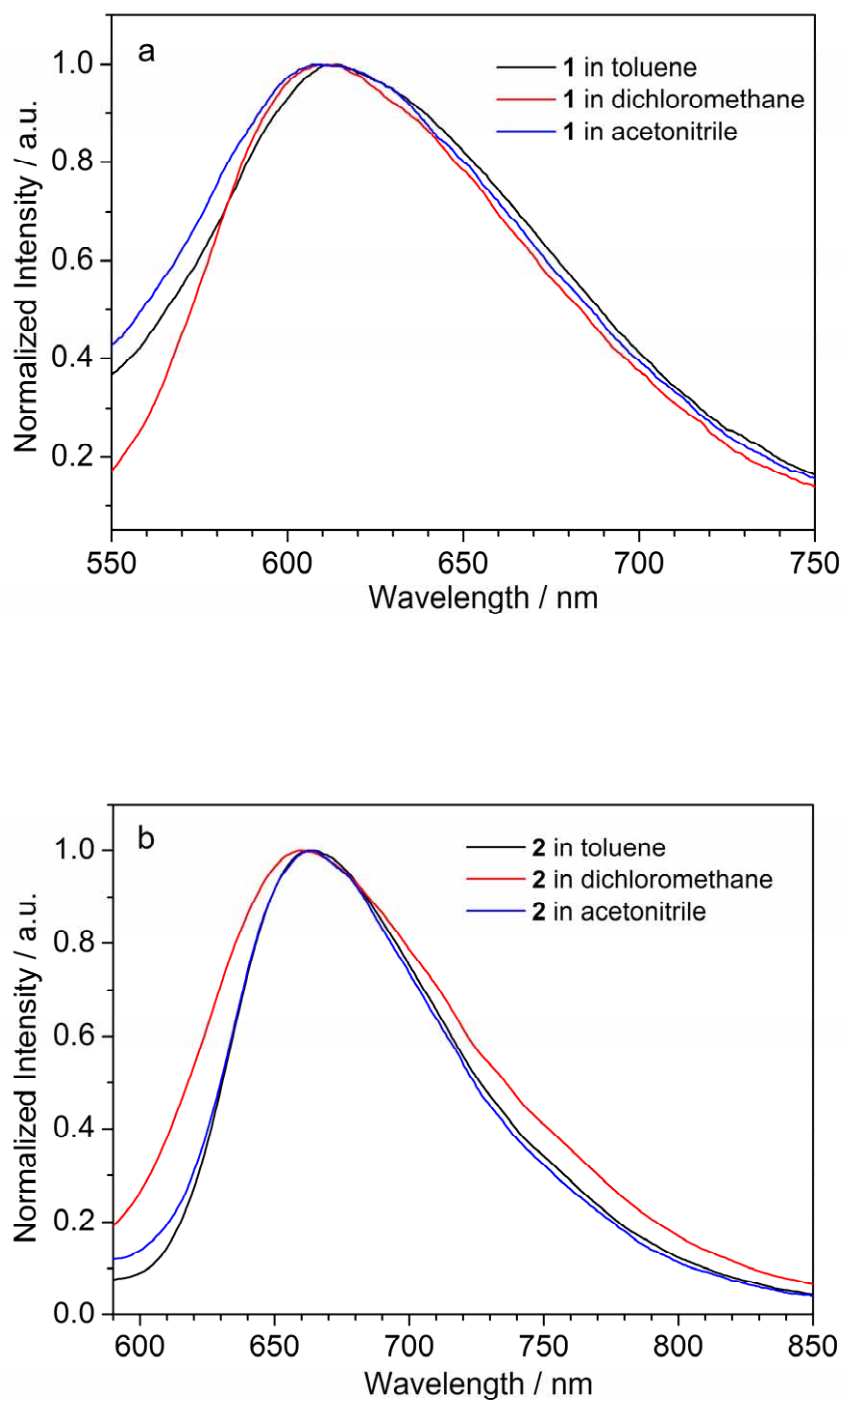

**Fig. S2** Emission spectra of **1** (a) and **2** (b) in toluene, dichloromethane and acetonitrile.

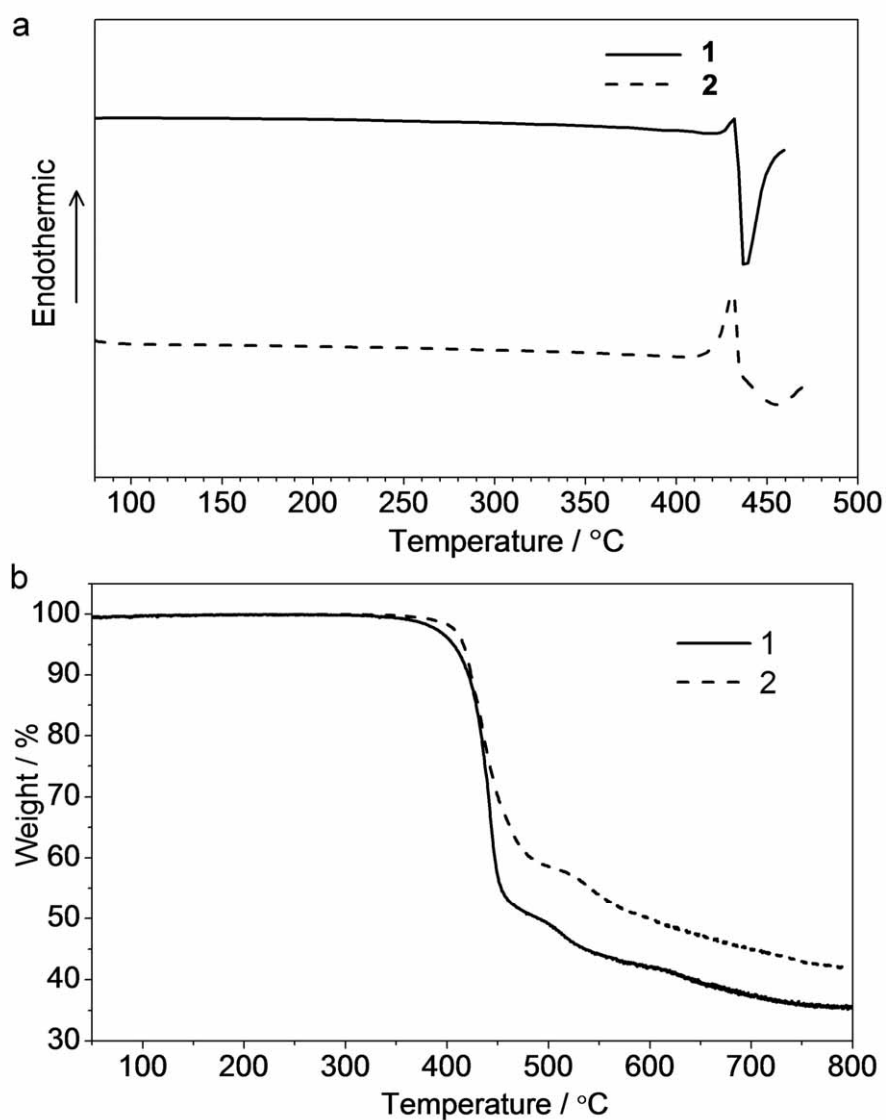

**Fig. S3** (a) DSC curves of **1** and **2** at a heating rate of 10 °C/min. (The second cycles were not carried out because **1** and **2** underwent a partial decomposition procedure during the first heating process.) and (b) TGA curves of **1** and **2** at a heating rate of 10 °C/min.

**Table S1.** Crystal data for complexes **1**<sup>a</sup> and **2**<sup>b</sup>.

|                                             | <b>1</b>                                                                     | <b>2</b>                                                                                    |
|---------------------------------------------|------------------------------------------------------------------------------|---------------------------------------------------------------------------------------------|
| formula                                     | C <sub>44</sub> H <sub>30</sub> B <sub>2</sub> N <sub>2</sub> O <sub>4</sub> | C <sub>44</sub> H <sub>30</sub> B <sub>2</sub> N <sub>2</sub> O <sub>2</sub> S <sub>2</sub> |
| fw                                          | 672.32                                                                       | 704.44                                                                                      |
| crystal system                              | triclinic                                                                    | triclinic                                                                                   |
| space group                                 | P <sub>-1</sub>                                                              | P <sub>-1</sub>                                                                             |
| <i>a</i> (Å)                                | 8.220(5)                                                                     | 9.813(7)                                                                                    |
| <i>b</i> (Å)                                | 8.960(7)                                                                     | 10.072(6)                                                                                   |
| <i>c</i> (Å)                                | 13.113(7)                                                                    | 10.185(6)                                                                                   |
| <i>α</i> (deg)                              | 74.48(2)                                                                     | 85.79(2)                                                                                    |
| <i>β</i> (deg)                              | 75.97(2)                                                                     | 77.07(2)                                                                                    |
| <i>γ</i> (deg)                              | 65.43(3)                                                                     | 63.68(2)                                                                                    |
| <i>V</i> (Å <sup>3</sup> )                  | 836.7(10)                                                                    | 879.0(9)                                                                                    |
| <i>Z</i>                                    | 1                                                                            | 1                                                                                           |
| <i>D<sub>c</sub></i> (g cm <sup>-3</sup> )  | 1.334                                                                        | 1.331                                                                                       |
| <i>θ</i> <sub>max</sub> (deg)               | 27.48                                                                        | 27.47                                                                                       |
| no. of reflns meads                         | 8244                                                                         | 8711                                                                                        |
| no. of reflns used                          | 3776                                                                         | 3993                                                                                        |
| no. of parameters                           | 236                                                                          | 235                                                                                         |
| <i>R</i> <sub>int</sub>                     | 0.0889                                                                       | 0.0484                                                                                      |
| final <i>R</i> [ <i>I</i> > 2σ( <i>I</i> )] |                                                                              |                                                                                             |
| R1                                          | 0.0786                                                                       | 0.0549                                                                                      |
| wR                                          | 0.1304                                                                       | 0.1064                                                                                      |
| <i>R</i> (all data)                         |                                                                              |                                                                                             |
| R1                                          | 0.1801                                                                       | 0.1013                                                                                      |
| wR2                                         | 0.1631                                                                       | 0.1230                                                                                      |
| GOF on <i>F</i> <sup>2</sup>                | 1.015                                                                        | 1.017                                                                                       |

<sup>a</sup> Summary of Data CCDC 823398

<sup>b</sup> Summary of Data CCDC 823399

**Table S2.** Selected bond lengths (Å) and angles (deg) for complexes **1** and **2**.

| Complex 1        |            |                   |            |
|------------------|------------|-------------------|------------|
| B(1)-O(2)        | 1.511(4)   | O(2)-B(1)-N(1)#1  | 102.8(2)   |
| B(1)-C(17)       | 1.593(4)   | C(17)-B(1)-N(1)#1 | 110.0(3)   |
| B(1)-C(11)       | 1.601(5)   | C(11)-B(1)-N(1)#1 | 107.4(2)   |
| B(1)-N(1)#1      | 1.630(4)   | C(6)-C(1)-O(1)    | 108.2(3)   |
| C(6)-N(1)        | 1.414(4)   | C(1)-C(6)-N(1)    | 106.6(2)   |
| C(7)-N(1)        | 1.312(4)   | N(1)-C(7)-O(1)    | 113.3(3)   |
| C(7)-O(1)        | 1.346(4)   | N(1)-C(7)-C(8)    | 124.4(3)   |
| C(7)-C(8)        | 1.431(4)   | O(1)-C(7)-C(8)    | 122.2(3)   |
| C(8)-C(10)#1     | 1.408(4)   | C(7)-N(1)-C(6)    | 106.4(3)   |
| C(10)-O(2)       | 1.350(3)   | C(7)-N(1)-B(1)#1  | 119.0(2)   |
| C(1)-C(6)        | 1.379(4)   | C(6)-N(1)-B(1)#1  | 134.4(2)   |
| C(1)-O(1)        | 1.396(3)   | C(7)-O(1)-C(1)    | 105.4(2)   |
| O(2)-B(1)-C(17)  | 111.4(2)   | C(10)-O(2)-B(1)   | 119.4(2)   |
| O(2)-B(1)-C(11)  | 109.7(3)   | C(10)#1-C(8)-C(7) | 115.3(3)   |
| C(17)-B(1)-C(11) | 114.8(3)   | O(2)-C(10)-C(8)#1 | 121.7(3)   |
| C(9)-C(8)-C(7)   | 122.6(3)   | O(2)-C(10)-C(9)   | 120.4(3)   |
| Complex 2        |            |                   |            |
| B(1)-O(1)        | 1.495(3)   | C(17)-B(1)-N(1)   | 108.97(18) |
| B(1)-C(17)       | 1.603(3)   | C(11)-B(1)-N(1)   | 108.49(18) |
| B(1)-C(11)       | 1.606(3)   | C(6)-C(1)-S(1)    | 110.60(16) |
| B(1)-N(1)        | 1.646(3)   | C(1)-C(6)-N(1)    | 112.90(19) |
| C(1)-S(1)        | 1.731(2)   | N(1)-C(7)-C(8)    | 122.4(2)   |
| C(6)-N(1)        | 1.410(3)   | N(1)-C(7)-S(1)    | 114.53(16) |
| C(7)-N(1)        | 1.324(3)   | C(8)-C(7)-S(1)    | 123.08(16) |
| C(7)-S(1)        | 1.718(2)   | C(9)-C(8)-C(7)    | 117.23(19) |
| C(9)-O(1)        | 1.339(2)   | C(10)#1-C(8)-C(7) | 121.7(2)   |
| C(7)-C(8)        | 1.447(3)   | O(1)-C(9)-C(10)   | 119.8(2)   |
| C(8)-C(9)        | 1.403(3)   | O(1)-C(9)-C(8)    | 121.27(18) |
| C(1)-C(6)        | 1.389(3)   | C(7)-N(1)-C(6)    | 111.79(18) |
| O(1)-B(1)-C(17)  | 105.41(18) | C(7)-N(1)-B(1)    | 120.44(17) |
| O(1)-B(1)-C(11)  | 111.20(18) | C(6)-N(1)-B(1)    | 127.77(17) |
| C(17)-B(1)-C(11) | 117.53(18) | C(9)-O(1)-B(1)    | 121.97(17) |
| O(1)-B(1)-N(1)   | 104.44(16) | C(7)-S(1)-C(1)    | 90.17(11)  |
